# Supplementary figures and images for: Genetic Variability among Swine Influenza Viruses in Italy: Data Analysis of the Period 2017–2020
Source: MDPI journal article supplement (doi:10.3390/v14010047), 2021-12-28

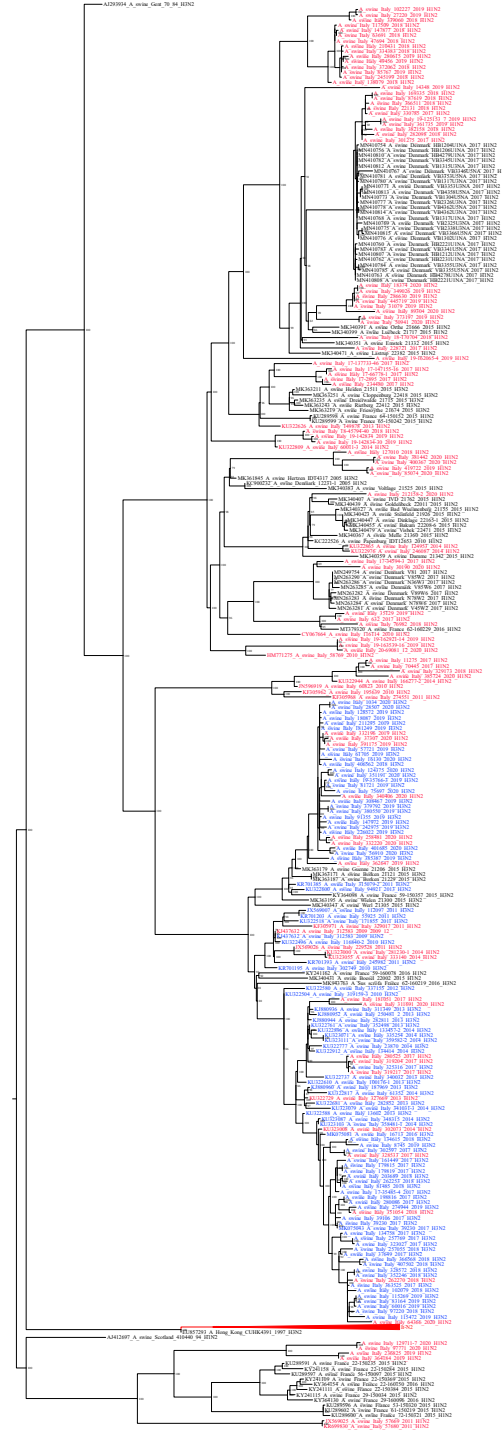

N2g

It-N2

N2s

Supplement: s1 [file s1]
